# Supplementary material for: One-dimensional nickel–cobalt bimetallic phosphide nanostructures for the oxygen evolution reaction
Source: Royal Society of Chemistry journal article supplement (doi:10.1039/d3se01412f), 2023-11-22
Supplement: d3se01412f1.pdf [file d3se01412f1.pdf]

# **One-dimensional nickel-cobalt bimetallic phosphide nanofibers for efficient oxygen evolution reaction**

Yue Wang, Xin Chang, Zexing Huang, Jiahui Fan, Lu Li\* and Mingyi Zhang\*

*Key Laboratory for Photonic and Electronic Bandgap Materials, Ministry of Education, School of  
Physics and Electronic Engineering, Harbin Normal University, Harbin 150025, People's Republic of  
China.*

\*Corresponding author:

Key Laboratory for Photonic and Electronic Bandgap Materials, Ministry of Education, School of  
Physics and Electronic Engineering, Harbin Normal University, Harbin 150025, P. R. China.

Email: [zhangmingyi@hrbnu.edu.cn](mailto:zhangmingyi@hrbnu.edu.cn) (M.Y. Zhang)

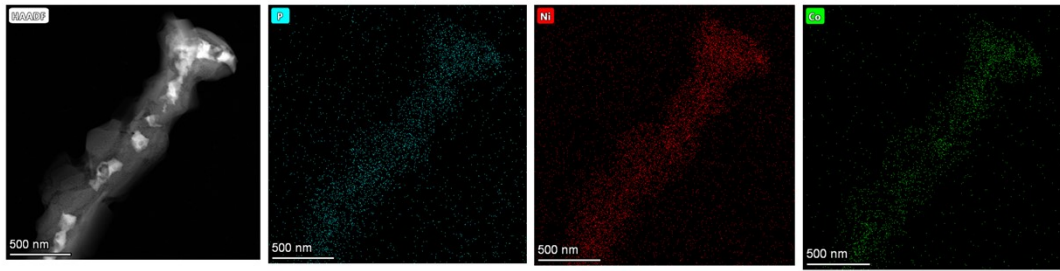

**Figure S1.** The corresponding elemental mappings of P, Ni, and Co of NiCoP-600 nanofibers.

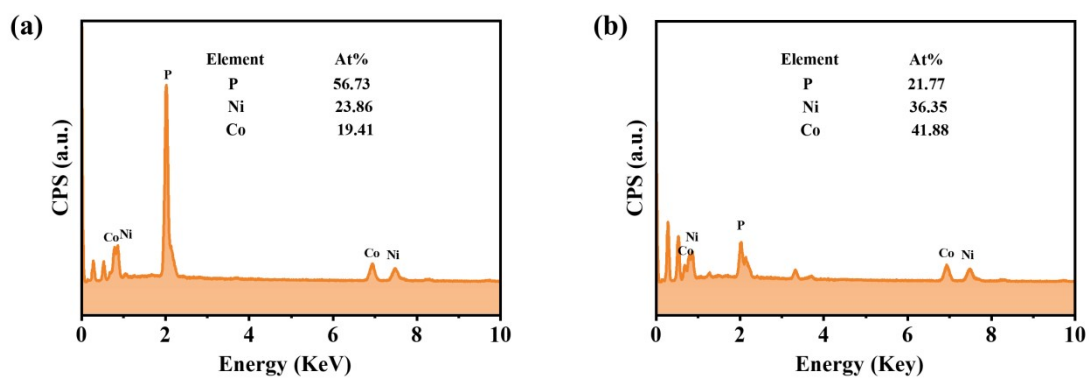

**Figure S2.** EDS images of NiCoP-600 catalysts before (a) and after (b) electrocatalytic OER

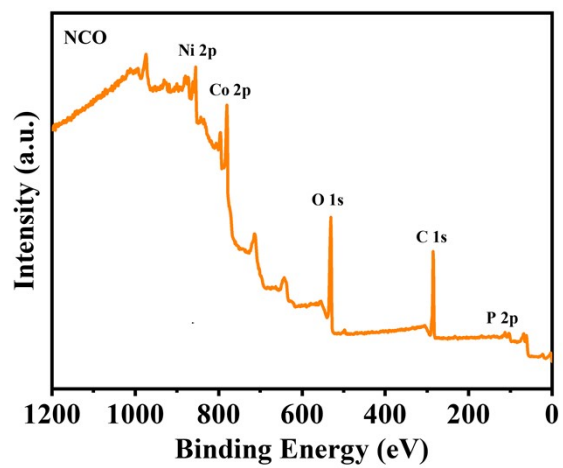

**Figure S3.** The XPS spectrum of Full spectrum of NiCo<sub>2</sub>O<sub>4</sub> nanofibers.

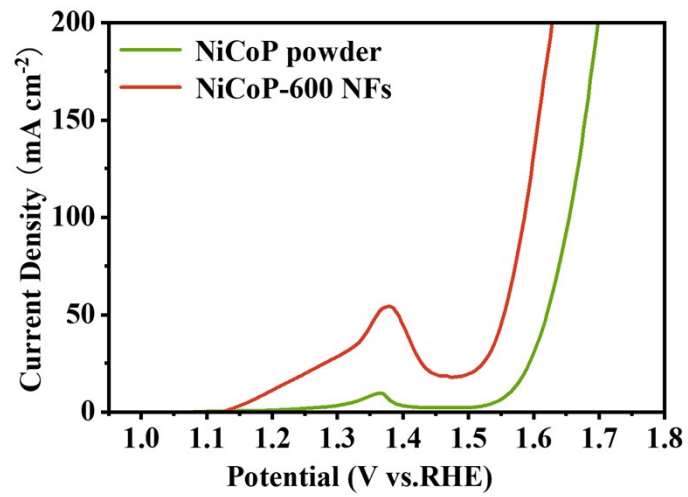

**Figure S4.** LSV curves of NiCoP powder and NiCoP-600 NFs.

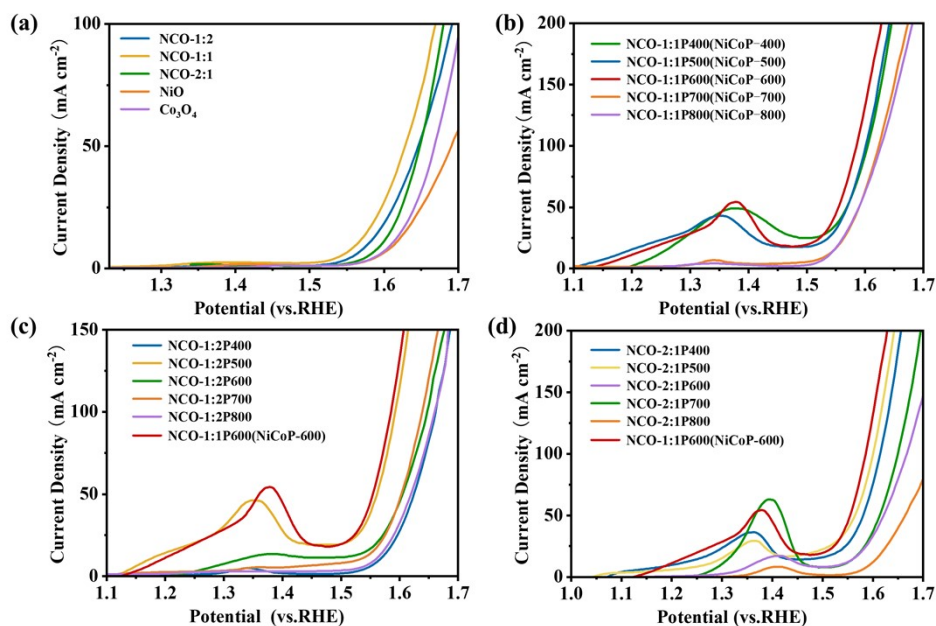

**Figure S5.**(a) LSV curves of NCO-1:1, NCO-1:2, NCO-2:1, NiO nanofibers, and Co<sub>3</sub>O<sub>4</sub> nanofibers. (b) LSV curves of NCO-1:1P400(NiCoP-400), NCO-1:1P500(NiCoP-500), NCO-1:1P600(NiCoP-600), NCO-1:1P700(NiCoP-700), and NCO-1:1P800(NiCoP-800). (c) LSV curves of NCO-1:2P400, NCO-1:2P500, NCO-1:2P600, NCO-1:2P700, NCO-1:2P800, and NCO-1:1P600. (d) LSV curves of NCO-2:1P400, NCO-2:1P500, NCO-2:1P600, NCO-2:1P700, NCO-2:1P800, and NCO-1:1P600.

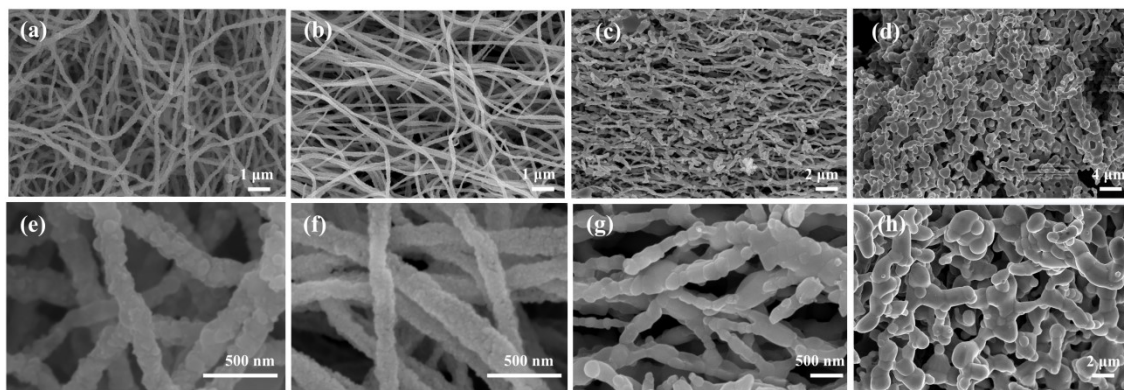

**Figure S6.** The SEM images of NiCoP-500(a, e), NiCoP-600(b, f), NiCoP-700(c, g), and NiCoP-800(d, h).

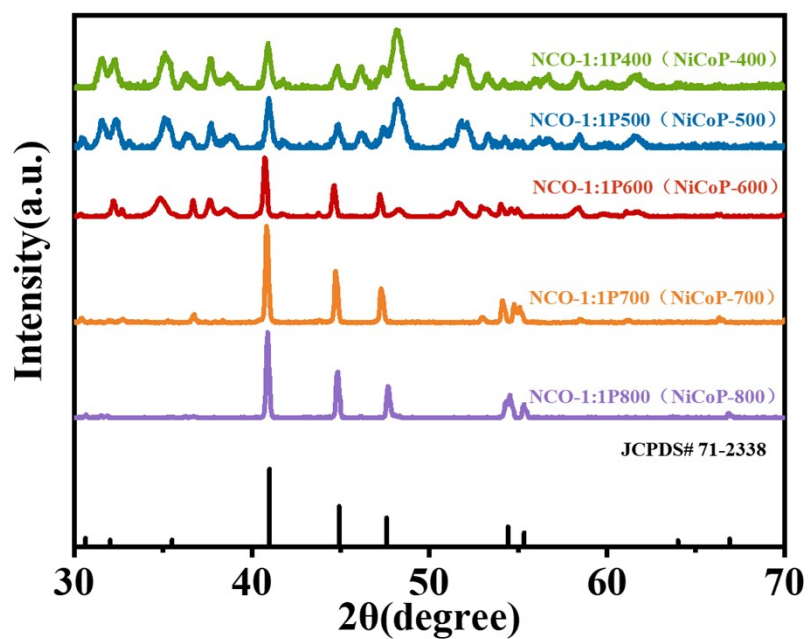

**Figure S7.** The XRD patterns of the NiCoP-400, NiCoP-500, NiCoP-600, NiCoP-700, and NiCoP-800 nanofibers.

---

Catalysts

Electrolyte

Overpotential

References

---



|                                                  |         | (mV)                    |           |
|--------------------------------------------------|---------|-------------------------|-----------|
|                                                  |         | @50 mA cm <sup>-2</sup> |           |
| NiCoP-600                                        | 1 M KOH | 325                     | this work |
| NiCo <sub>2</sub> O <sub>4</sub> NFs             | 1 M KOH | 400                     | this work |
| CoRuPO/NFs                                       | 1 M KOH | 342                     | 1         |
| NiS <sub>x</sub> /Ni(OH) <sub>2</sub> /NiOOH     | 1 M KOH | 374                     | 2         |
| Ce-CoSe <sub>2</sub>                             | 1 M KOH | 398                     | 3         |
| Co-Ni <sub>3</sub> S <sub>2</sub> /NFs           | 1 M KOH | 459                     | 4         |
| Ni <sub>2</sub> P/Mn <sub>2</sub> O <sub>3</sub> | 1 M KOH | 367                     | 5         |
| CNF/Co-CNT                                       | 1 M KOH | 359                     | 6         |

**Table S1.** Summary of various OER catalysts that have been proposed.

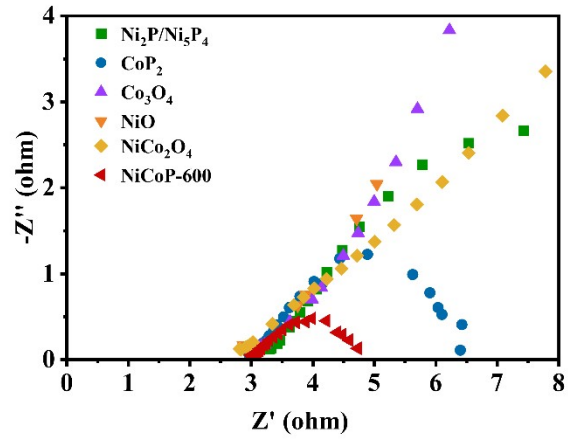

**Figure S8.** EIS pattern of the NiO nanofibers,  $\text{Co}_3\text{O}_4$  nanofibers ,  $\text{NiCo}_2\text{O}_4$  nanofibers ,  $\text{Ni}_2\text{P}/\text{Ni}_5\text{P}_4$  nanofibers ,  $\text{CoP}_2$  nanofibers, and  $\text{NiCoP-600}$  nanofibers.

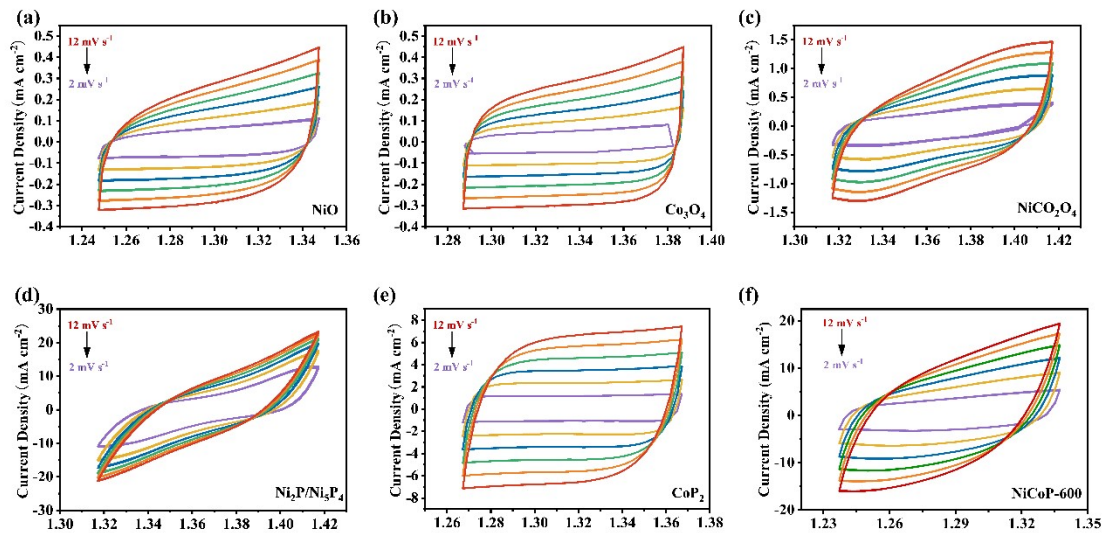

**Figure S9.** The CV diagram of the NiO nanofibers(a), Co<sub>3</sub>O<sub>4</sub> nanofibers(b), NiCo<sub>2</sub>O<sub>4</sub> nanofibers(c), Ni<sub>2</sub>P/Ni<sub>5</sub>P<sub>4</sub> nanofibers(d), CoP<sub>2</sub> nanofibers(e), and NiCoP-600 nanofibers(f).

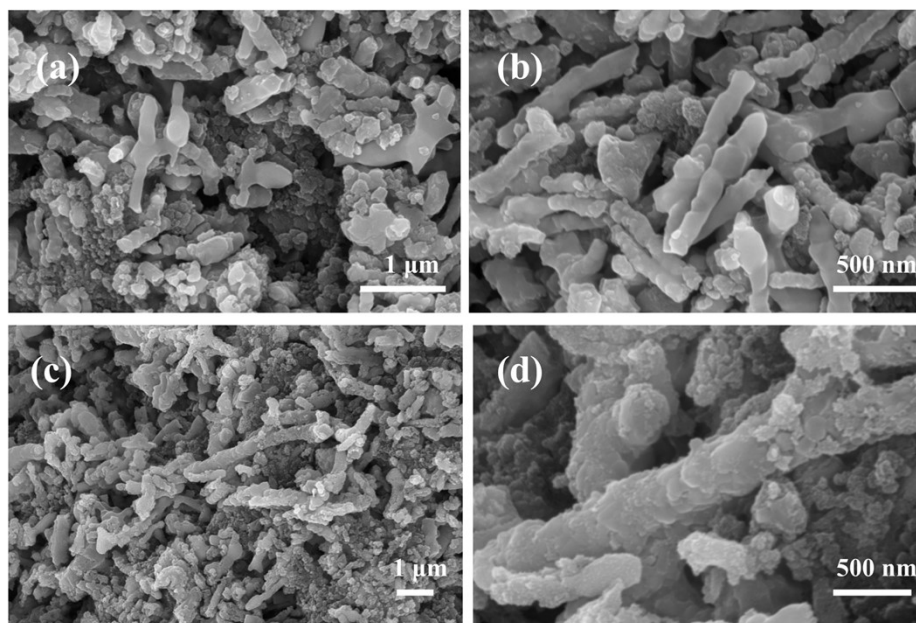

**Figure S10.** The SEM images of NiCoP-600 catalysts before (a,b) and after (c,d) electrocatalytic OER

- 1 J. Niu, J. Yang, A. I. Channa, E. Ashalley, J. Yang, J. Jiang, H. Li, H. Ji and X. Niu, *RSC Adv.*, 2020, **10**, 27235-27241.
- 2 L. Xia, W. Jiang, H. Hartmann, J. Mayer, W. Lehnert and M. Shviro, *ACS Appl. Mater. Interfaces*, 2022, **14**, 19397-19408.
- 3 Q. He, X. Wang, P. Zhou, Q. Ge, T. Fu, S. Chen, F. Xiao, P. Yang, P. He, L. Jia and D. Yang, *J. Mater. Sci.*, 2021, **56**, 20037-20049.
- 4 X. Wang, S. Wang, S. Chen, P. He, Y. Xu, L. Jia, D. Yang, X. He, H. Deng, Bin Jia, H. Zhang and H. Liu, *Int. J. Hydrogen Energy*, 2020, **45**, 19304-19312.
- 5 B. Yang, X. Chang, X. Ding, X. Ma and M. Zhang, *J. Colloid Interface Sci.*, 2022, **623**, 196-204.
- 6 X. Guo, M. Yu, X. Chang, X. Ma and M. Zhang, *ACS Appl. Nano Mater.*, 2022, **5**, 16594-16601.
